# Supplementary material
Source: PubMed Central journal article supplement (PMC6641268)
Supplement: ao7b01621_si_001.pdf [file ao7b01621_si_001.pdf]

# Hierarchically structured porous spinels, via an epoxide-mediated sol-gel process, accompanied by polymerization-induced phase separation

Jan Herwig<sup>†</sup>, Juliane Titus<sup>‡</sup>, Jens Kullmann<sup>‡</sup>, Nicole Wilde<sup>‡</sup>, Thomas Hahn<sup>†</sup>, Roger Gläser<sup>‡</sup>, Dirk Enke<sup>‡,\*</sup>

<sup>†</sup>Institute of Chemistry, Martin-Luther-University Halle-Wittenberg, Von-Danckelmann-Platz 4, 06120 Halle (S.), Germany

<sup>‡</sup>Institute of Chemical Technology, University of Leipzig, Linnéstraße 3, 04103 Leipzig, Germany

---

For Table of Contents Only:

ICP-OES-results, SEM-EDX images

---

**Table S1. Sample composition of the Ni-Al system (from ICP-OES).**

| Sample | Concentration <sup>a,b</sup> |               | Ni content <sup>c</sup> |                                    |
|--------|------------------------------|---------------|-------------------------|------------------------------------|
|        | Al<br>/ wt.-%                | Ni<br>/ wt.-% | measured<br>/ mol-%     | calculated <sup>d</sup><br>/ mol-% |
| 3Ni    | 49.7                         | 3.5           | 3.1                     | 3.3                                |
| 22Ni   | 34.0                         | 18.9          | 20.3                    | 22.0                               |
| 33Ni   | 26.6                         | 28.2          | 32.8                    | 33.0                               |

<sup>a</sup> based on total sample mass

<sup>b</sup> corrected values after ICP-analysis

<sup>c</sup> based on total metal amount (Al+Ni)

<sup>d</sup> calculated from initial metal weight (Al+Ni)

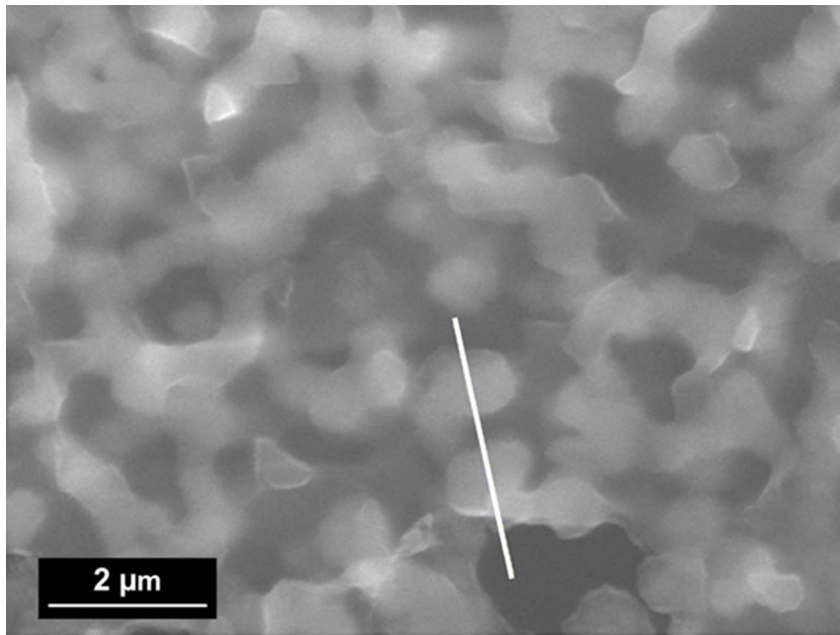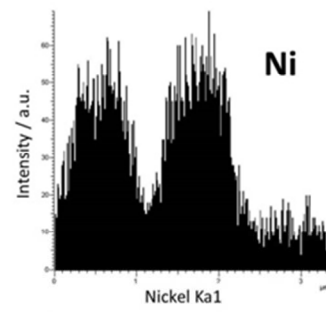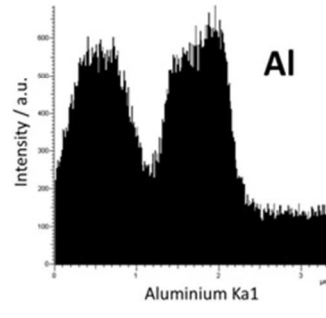

Figure S1. SEM-EDX image of 22Ni-2 with EDX linescan.

**Table S2. Sample composition of the Co-Al system (from ICP-OES).**

| Sample | Concentration <sup>a,b</sup> |               | Co content <sup>c</sup> |                                    |
|--------|------------------------------|---------------|-------------------------|------------------------------------|
|        | Al<br>/ wt.-%                | Co<br>/ wt.-% | measured<br>/ mol-%     | calculated <sup>d</sup><br>/ mol-% |
| 3Co    | 48.2                         | 3.7           | 3.4                     | 3.3                                |
| 22Co   | 46.5                         | 19.6          | 22.6                    | 22.1                               |
| 33Co   | 30.0                         | 31.4          | 32.4                    | 33.0                               |

<sup>a</sup> based on total sample mass

<sup>b</sup> corrected values after ICP-analysis

<sup>c</sup> based on total metal amount (Al + Co)

<sup>d</sup> calculated from initial metal weight (Al + Co)

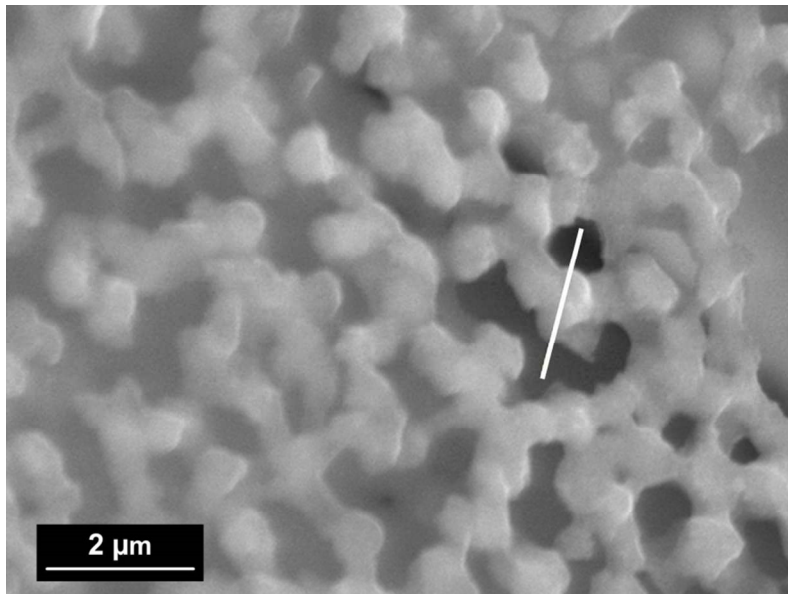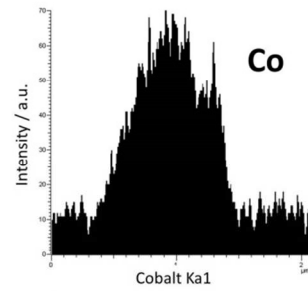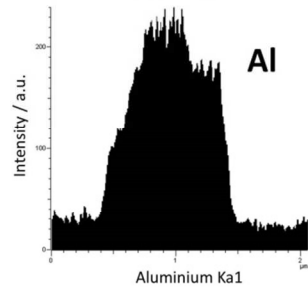

Figure S2. SEM-EDX image of 22Co-2 with EDX-linescan.
